# Supplementary material for: RNF138 Downregulates Antiviral Innate Immunity by Inhibiting IRF3 Activation
Source: MDPI journal article supplement (doi:10.3390/ijms242216110), 2023-11-09
Supplement: s1 [file s1]

**Supplementary information Table S1 Primers for qPCR**

| Gene          | Species | Forward primer (5'-3')      | Reverse primer (5'-3')      |
|---------------|---------|-----------------------------|-----------------------------|
| <i>GAPDH</i>  | Human   | ATGACATCAAGAAGGTG<br>GTG    | CATACCAGGAAATGAGC<br>TTG    |
| <i>CXCL10</i> | Human   | GCTCTACTGAGGTGCTA<br>TGTTT  | GGAGGATGGCAGTGG<br>AGTC     |
| <i>RNF138</i> | Human   | CAGACAGCGTTTACTGG<br>ATCAC  | TGGTAATCTGGCTAGGA<br>TCTCC  |
| <i>IFNB1</i>  | Human   | AGGACAGGATGAACTTT<br>GAC    | TGATAGACATTAGCCAG<br>GAG    |
| <i>ISG15</i>  | Human   | GAGAGGCAGCGAACTC<br>ATCTT   | CCAGCATCTTCACCGTC<br>AGG    |
| <i>IL-6</i>   | Human   | ACTCACCTCTTCAGAAC<br>GAATTG | CCATCTTTGGAAGGTTC<br>AGGTTG |
| <i>PTEN</i>   | Human   | TGGATTCGACTTAGACT<br>TGACCT | GGTGGGTTATGGTCTTC<br>AAAAGG |

**Supplementary Table S2 Primers for shRNA**

|                                                                |
|----------------------------------------------------------------|
| shRNF138#1 Forward                                             |
| CCGGTTTGAACGATGTGATTGATATCTCGAGATATCAATCACATCGTTCAAA<br>TTTTTG |
| shRNF138#1 Reverse                                             |
| AATTCAAAAATTTGAACGATGTGATTGATATCTCGAGATATCAATCACATCG<br>TTCAAA |
| shRNF138#2 Forward                                             |
| CCGGGCTAGATGAAGAAACCCAATACTCGAGTATTGGGTTTCTTCATCTAGC<br>TTTTTG |
| shRNF138#2 Reverse                                             |
| AATTCAAAAAGCTAGATGAAGAAACCCAATACTCGAGTATTGGGTTTCTTC<br>ATCTAGC |
| shRNF138#3 Forward                                             |
| CCGGCCTAGCCAGATTACCAGAAATCTCGAGATTTCTGGTAATCTGGCTAG<br>GTTTTTG |
| shRNF138#3 Reverse                                             |
| AATTCAAAAACCTAGCCAGATTACCAGAAATCTCGAGATTTCTGGTAATCTG<br>GCTAGG |

**Supplementary Table S3 Primers for sgRNA**

| Gene                  | Species | Forward primer (5'-3')         | Reverse primer (5'-3')       |
|-----------------------|---------|--------------------------------|------------------------------|
| <i>RNF138-sgRNA#1</i> | Human   | CACCGCAAAACGCCCCG<br>TGCGGACCA | AAACTGGTCCGCACGGGC<br>GTTTTG |

|                       |       |                              |                              |
|-----------------------|-------|------------------------------|------------------------------|
| <i>RNF138-sgRNA#2</i> | Human | CACCGTAGAAATCATCT<br>TCGGTGT | AAACACACCGAAGATGAT<br>TTCTAC |
| <i>Rnf138-sgRNA</i>   | Mouse | CACCGTCGGCGGCCAC<br>GTCCTACA | AAACTGTAGGACGTGGCC<br>GCCGAC |
